# Supplementary material
Source: publisher site journal article supplement (http://www.spandidos-publications.com/3305/downloadSupplementary)
Supplement: Supplementary file 1 [file downloadSupplementary]

## Sheet: Sheet1
Table SII. Biological information of the common diffrentially expressed circRNAs.
circRNAs	Position	log2 (fold change)	Regulation	Gene Symbol
hsa_circ_0025908	chr12:42398994_42384940	4.893	up	PPHLN1
hsa_circ_0004442	chr2:171046362_171028339	3.8929	up	TLK1
hsa_circ_0025887	chr12:40304134_40302789	3.88458	up	LRRK2
hsa_circ_0017077	chr1:235697272_235677091	3.56306	up	LYST
hsa_circ_0073237	chr5:83542268_83537007	2.59493	up	VCAN
hsa_circ_0004658	chr18:2892486_2890561	2.40157	up	EMILIN2
hsa_circ_0009000	chr7:30622462_30621393	2.20631	up	GARS
hsa_circ_0124321	chr3:56745462_56737185	1.74282	up	ARHGEF3
hsa_circ_0000396	chr12:46243314_46229153	-1.06437	down	SLC38A1
hsa_circ_0000591	chr15:41669958_41668828	-1.1423	down	MGA
NA	chr5:66054951_66053406	-1.26879	down	ERBIN
hsa_circ_0006773	chr7:27649633_27629371	-1.34435	down	HIBADH
NA	chr10:5714207_5699525	-1.85839	down	FAM208B
NA	chr1:113855049_113833111	-2.13127	down	PTPN22
hsa_circ_0001069	chr2:135639122_135631718	-2.13921	down	R3HDM1
hsa_circ_0106062	chr16:83912367_83906987	-2.19047	down	MLYCD
hsa_circ_0000099	chr1:103575540_103565435	-2.85033	down	AMY2B
NA	chr6:90271941_90088961	-3.20813	down	BACH2
hsa_circ_0128256	chr5:146701142_146691128	-3.25347	down	PPP2R2B
hsa_circ_0023231	chr11:68583129_68567014	-3.69306	down	PPP6R3
hsa_circ_0032873	chr14:88715195_88712271	-4.16328	down	EML5
